# Supplementary material
Source: PubMed Central journal article supplement (PMC9392337)
Supplement: 13063_2022_6606_MOESM3_ESM.pdf [file 13063_2022_6606_MOESM3_ESM.pdf]

## **S3 File. Recorded educational intervention during the follow-up period**

To see in: <https://youtu.be/tR3v2chVXpA>
