# Supplementary material
Source: PubMed Central journal article supplement (PMC9392337)
Supplement: 13063_2022_6606_MOESM7_ESM.pdf [file 13063_2022_6606_MOESM7_ESM.pdf]

**S7 Table 6. Participants who reported at least one symptom related to COVID-19 during the follow-up period (Dry cough, Fever, Sore throat, Shortness of breath, Fatigue/extreme tiredness, Diarrhea, Alterations of smell or taste)**

| <b>Table 6. Participants who reported at least one symptom related to COVID-19 during the follow-up period (Dry cough, Fever, Sore throat, Shortness of breath, Fatigue/extreme tiredness, Diarrhea, Alterations of smell or taste)</b> |                         |                         |                         |
|-----------------------------------------------------------------------------------------------------------------------------------------------------------------------------------------------------------------------------------------|-------------------------|-------------------------|-------------------------|
|                                                                                                                                                                                                                                         | <b>Week 1<br/>N (%)</b> | <b>Week 2<br/>N (%)</b> | <b>Week 3<br/>N (%)</b> |
| <i>Active control group (n=142)</i>                                                                                                                                                                                                     |                         |                         |                         |
| <b>Reported any symptom</b>                                                                                                                                                                                                             | <b>4(2·8%)</b>          | <b>3(2·1%)</b>          | <b>4(2·9%)</b>          |
| Cough                                                                                                                                                                                                                                   | 3(75%)                  | 1(33·3%)                | 1(25%)                  |
| Fever                                                                                                                                                                                                                                   | 0(0%)                   | 0(0%)                   | 0(0%)                   |
| Sore throat                                                                                                                                                                                                                             | 1(25%)                  | 3(100%)                 | 2(50%)                  |
| Shortness of breath                                                                                                                                                                                                                     | 1(25%)                  | 0(0%)                   | 1(25%)                  |
| Fatigue/extreme tiredness                                                                                                                                                                                                               | 0(0%)                   | 2(66·7%)                | 0(0%)                   |
| Diarrhea                                                                                                                                                                                                                                | 0(0%)                   | 0(0%)                   | 0(0%)                   |
| Alterations of taste or smell                                                                                                                                                                                                           | 0(0%)                   | 1(33·3%)                | 0(0%)                   |
| Epidemiological nexus                                                                                                                                                                                                                   | 1(25%)                  | 1(33·3%)                | 2(50%)                  |
| <i>Intervention group (n=141)</i>                                                                                                                                                                                                       |                         |                         |                         |
| <b>Reported any symptom</b>                                                                                                                                                                                                             | <b>3(2·1%)</b>          | <b>2(1·5%)</b>          | <b>2(1·4%)</b>          |
| Cough                                                                                                                                                                                                                                   | 1(33·3%)                | 1(50%)                  | 0(0%)                   |
| Fever                                                                                                                                                                                                                                   | 1(33·3%)                | 0(0%)                   | 0(0%)                   |
| Sore throat                                                                                                                                                                                                                             | 1(33·3%)                | 1(50%)                  | 1(50%)                  |
| Shortness of breath                                                                                                                                                                                                                     | 1(33·3%)                | 0(0%)                   | 0(0%)                   |
| Fatigue/extreme tiredness                                                                                                                                                                                                               | 1(33·3%)                | 1(50%)                  | 0(0%)                   |
| Diarrhea                                                                                                                                                                                                                                | 1(33·3%)                | 1(50%)                  | 0(0%)                   |
| Alterations of taste or smell                                                                                                                                                                                                           | 1(33·3%)                | 0(0%)                   | 0(0%)                   |
| Epidemiological nexus                                                                                                                                                                                                                   | 1(33·3%)                | 0(0%)                   | 0(0%)                   |
