# Supplementary material
Source: PubMed Central journal article supplement (PMC9392337)
Supplement: 13063_2022_6606_MOESM8_ESM.pdf [file 13063_2022_6606_MOESM8_ESM.pdf]

## S8 Table. Post hoc analysis of the primary outcome considering the adherence

| <b>Table 7. Post hoc analysis for comparison of the primary outcome between groups</b> |                                                                 |                                               |                                                  |                 |
|----------------------------------------------------------------------------------------|-----------------------------------------------------------------|-----------------------------------------------|--------------------------------------------------|-----------------|
|                                                                                        | <b>Face shield +<br/>surgical face<br/>mask group<br/>N (%)</b> | <b>Surgical face<br/>mask group<br/>N (%)</b> | <b>Absolute risk difference<br/>(%) (CI 95%)</b> | <b>p-value*</b> |
| <b>High adherence</b>                                                                  | <b>(N=35)</b>                                                   | <b>(N=126)</b>                                | <b>(%) (CI 95%)</b>                              |                 |
| Primary composite outcome                                                              | 1 (2.8)                                                         | 3 (2.1)                                       | 1.28 (-4.64 – 7.21)                              | 0.52            |
| Positive RT-PCR test                                                                   | 1 (2.8)                                                         | 1 (0.7)                                       | 2.06 (-3.66 – 7.79)                              | 0.38            |
| Positive Antibody test                                                                 |                                                                 |                                               |                                                  |                 |
| IgG                                                                                    | 0(0)                                                            | 2 (1.4)                                       | -0.79 (-2.34 – 0.75)                             | 0.78            |
| IgM                                                                                    | 0(0)                                                            | 0(0)                                          | -                                                | -               |
| <b>High and medium-high<br/>adherence</b>                                              | <b>(N=103)</b>                                                  | <b>(N=141)</b>                                | <b>(%) (CI 95%)</b>                              |                 |
| Primary composite outcome                                                              | 1(0.9)                                                          | 3 (2.1)                                       | -1.16 (-4.1 – 1.88)                              | 0.43            |
| Positive RT-PCR test                                                                   | 1 (0.9)                                                         | 1 (0.7)                                       | 0.26 (-2.08 – 2.60)                              | 0.66            |
| Positive Antibody test                                                                 |                                                                 |                                               |                                                  |                 |
| IgG                                                                                    | 0(0)                                                            | 2 (1.4)                                       | -1.42 (-3.37 – 0.53)                             | 0.33            |
| IgM                                                                                    | 0(0)                                                            | 0(0)                                          | -                                                | -               |
| <b>High, medium-high, and<br/>medium adherence</b>                                     | <b>(N=110)</b>                                                  | <b>(N=141)</b>                                | <b>(%) (CI 95%)</b>                              |                 |
| Primary composite outcome                                                              | 1(0.9)                                                          | 3 (2.1)                                       | -1.21 (-4.18 – 1.75)                             | 0.40            |
| Positive RT-PCR test                                                                   | 1 (0.9)                                                         | 1 (0.7)                                       | 0.19 (-2.05 – 2.45)                              | 0.68            |
| Positive Antibody test                                                                 |                                                                 |                                               |                                                  |                 |
| IgG                                                                                    | 0(0)                                                            | 2 (1.4)                                       | -1.41 (-3.3 – 0.53)                              | 0.31            |
| IgM                                                                                    | 0(0)                                                            | 0(0)                                          | -                                                | -               |
